# Supplementary material for: Circulating Levels of the Interferon-γ-Regulated Chemokines CXCL10/CXCL11, IL-6 and HGF Predict Outcome in Metastatic Renal Cell Carcinoma Patients Treated with Antiangiogenic Therapy
Source: MDPI journal article supplement (doi:10.3390/cancers13112849), 2021-06-07
Supplement: s1 [file s1]

# Supplementary Materials: Circulating Levels of the Interferon- $\gamma$ -Regulated Chemokines CXCL10/CXCL11, IL-6 and HGF Predict Outcome in Metastatic Renal Cell Carcinoma Patients Treated with Antiangiogenic Therapy

Emilio Esteban, Francisco Exposito, Guillermo Crespo, Julio Lambea, Alvaro Pinto, Javier Puente, Jose Angel Arranz, Miriam Redrado, Cristina Rodriguez-Antona, Carlos de Andrea, Marta Lopez-Brea, Esther Redin, Angel Rodriguez, Diego Serrano, Jorge Garcia, Enrique Grande, Daniel Castellano and Alfonso Calvo

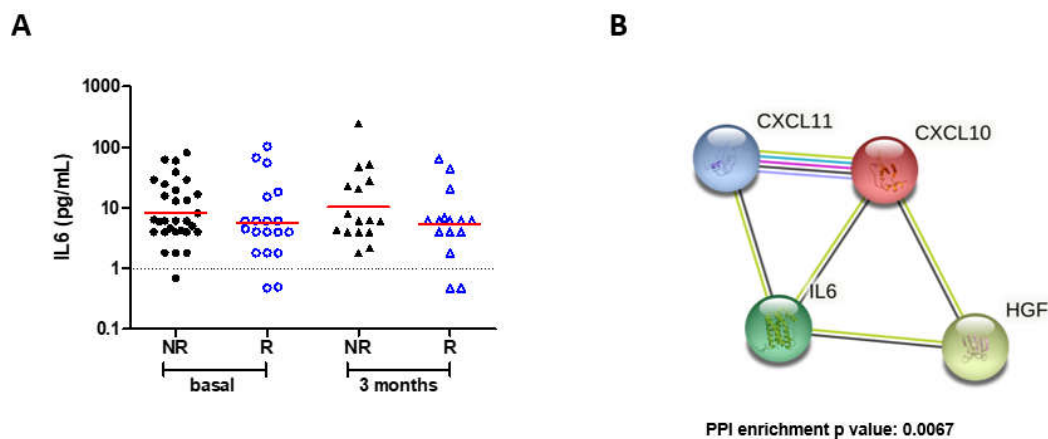

**Figure S1.** Blood levels of IL-6 in responder and non-responder patients (A). STRING network analysis reveals significant interactions between HGF, IL-6, CXCL10 and CXCL11 (PPI enrichment p value: 0.0067) (B).

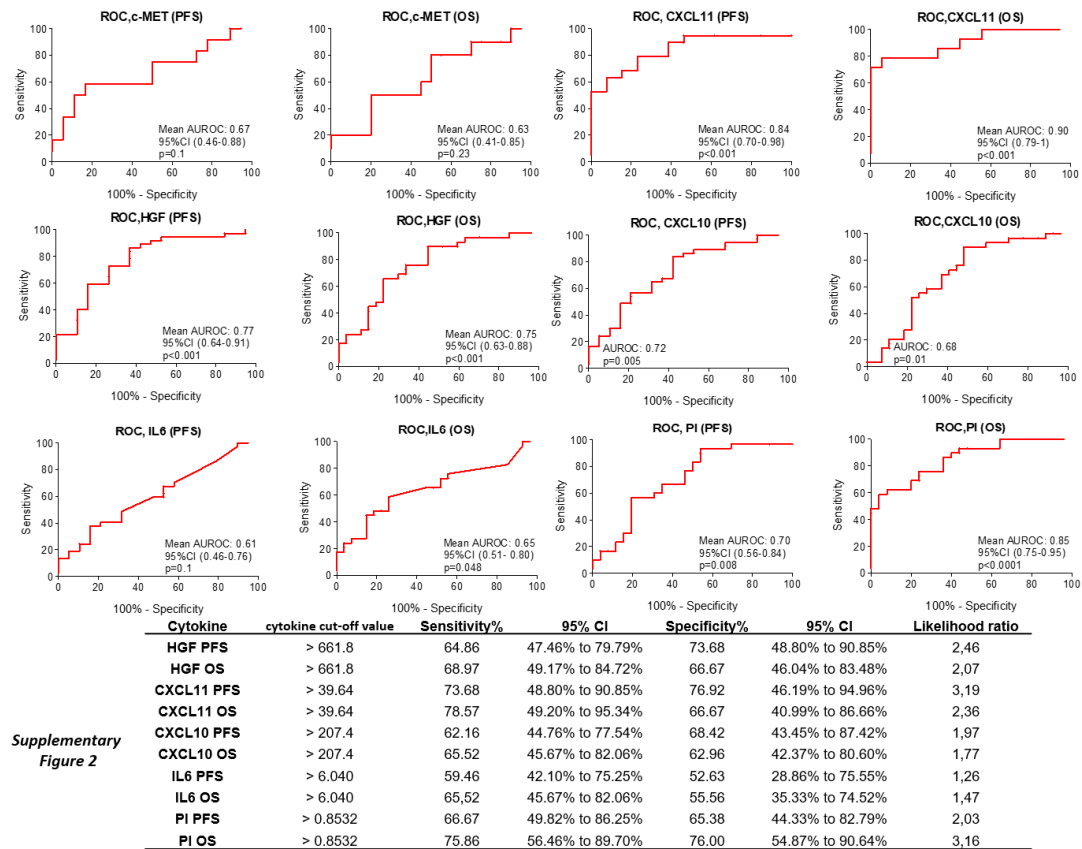

**Figure S2.** Performance parameters for prediction of PFS and OS: ROC curves for the individual biomarkers and for the PI. Sensitivity and specificity data at the optimal cut-off value are shown in the Table below the graphics.

**Table S1.** Toxicities found in the study.

|                    |     | Toxicity        |                 |                             |           | p     |
|--------------------|-----|-----------------|-----------------|-----------------------------|-----------|-------|
| Presented Toxicity | No  | 2 (39%)         | -               | -                           | 2 (3.3)   | 0.718 |
|                    | Yes | 49 (96.1)       | 4 (100)         | 5 (100)                     | 58 (96.7) |       |
| Toxicity (Grade)   |     | Sunitinib n (%) | Pazopanib n (%) | Sunitinib / Pazopanib n (%) | Total     | p     |
| Asthenia           | G1  | 10 (30.3)       | -               | 1 (50.0)                    | 11 (28.9) | 0.281 |
|                    | G2  | 17 (51.5)       | 2 (66.7)        | -                           | 19 (50.0) |       |
|                    | G3  | 6 (18.2)        | 1 (33.3)        | 1 (50.0)                    | 8 (21.1)  |       |
|                    | G4  | -               | -               | -                           | -         |       |
|                    | ✱   | 33 (64.7)       | 3 (75.0)        | 2 (40)                      | 38 (63.3) | 0.495 |
| Neutropenia        | G1  | 1 (16.7)        | -               | -                           | 1 (16.7)  | -     |
|                    | G2  | 2 (33.3)        | -               | -                           | 2 (33.3)  |       |
|                    | G3  | 3 (50.0)        | -               | -                           | 3 (50.0)  |       |
|                    | G4  | -               | -               | -                           | -         |       |
|                    | ✱   | 6 (11.8)        | -               | -                           | 6 (10)    | 0.356 |
| Hand-foot syndrome | G1  | 4 (28.6)        | -               | -                           | 4 (26.7)  | 0.242 |
|                    | G2  | 7 (50.0)        | -               | -                           | 7 (46.7)  |       |
|                    | G3  | 3 (21.4)        | -               | 1 (100)                     | 4 (26.7)  |       |
|                    | G4  | -               | -               | -                           | -         |       |
|                    | ✱   | 14 (27.5)       | -               | 1 (20)                      | 15 (25.0) | 0.282 |
| Hypertension       | G1  | 9 (56.3)        | 1 (50.0)        | -                           | 10 (52.6) | 0.121 |
|                    | G2  | 6 (37.5)        | -               | -                           | 6 (31.6)  |       |

|                  |    |           |          |          |           |       |
|------------------|----|-----------|----------|----------|-----------|-------|
|                  | G3 | 1 (6.3)   | 1 (50.0) | 1 (100)  | 3 (15.8)  |       |
|                  | G4 | -         | -        | -        | -         |       |
|                  | ✱  | 17 (33.3) | 2 (50.0) | 1 (20.0) | 20 (33.3) | 0.635 |
| Hypothyroidism   | G1 | 2 (50.0)  | -        | -        | 2 (50.0)  |       |
|                  | G2 | 2 (50.0)  | -        | -        | 2 (50.0)  |       |
|                  | G3 | -         | -        | -        | -         | -     |
|                  | G4 | -         | -        | -        | -         |       |
|                  | ✱  | 5 (9.8)   | -        | -        | 5 (8.3)   | 0.427 |
| Cardiotoxicity   | G1 | -         | -        | -        | -         |       |
|                  | G2 | -         | -        | -        | -         |       |
|                  | G3 | 1 (100)   | -        | -        | 1 (100)   | -     |
|                  | G4 | -         | -        | -        | -         |       |
|                  | ✱  | 1 (2.0)   | -        | -        | 1 (1.7)   | 0.849 |
| Mucositis        | G1 | 13 (48.1) | 1 (100)  | 2 (40.0) | 16 (48.5) |       |
|                  | G2 | 10 (37.0) | -        | 2 (40.0) | 12 (36.4) |       |
|                  | G3 | 4 (14.8)  | -        | 1 (20)   | 5 (15.2)  | 0.805 |
|                  | G4 | -         | -        | -        | -         |       |
|                  | ✱  | 27 (52.9) | 1 (25)   | 5 (100)  | 33 (55.0) | 0.023 |
| Diarrhea         | G1 | 9 (52.9)  | 3 (100)  | 1 (50.0) | 13 (59.1) |       |
|                  | G2 | 6 (35.3)  | -        | 1 (50.0) | 7 (31.8)  |       |
|                  | G3 | 2 (11.8)  | -        | -        | 2 (9.1)   | 0.403 |
|                  | G4 | -         | -        | -        | -         |       |
|                  | ✱  | 18 (35.3) | 3 (75.0) | 2 (40.0) | 23 (38.3) | 0.297 |
| Leukopenia       | G1 | 4 (57.1)  | -        | -        | 4 (57.1)  |       |
|                  | G2 | 2 (28.6)  | -        | -        | 2 (28.6)  |       |
|                  | G3 | 1 (14.3)  | -        | -        | 1 (14.3)  | -     |
|                  | G4 | -         | -        | -        | -         |       |
|                  | ✱  | 7 (13.7)  | -        | -        | 7 (11.7)  | 0.297 |
| Anemia           | G1 | 6 (42.9)  | -        | -        | 6 (42.9)  |       |
|                  | G2 | 6 (42.9)  | -        | -        | 6 (42.9)  |       |
|                  | G3 | 1 (7.1)   | -        | -        | 1 (7.1)   | -     |
|                  | G4 | 1 (7.1)   | -        | -        | 1 (7.1)   |       |
|                  | ✱  | 14 (27.5) | -        | -        | 14 (23.3) | 0.073 |
| Thrombocytopenia | G1 | 7 (50.0)  | -        | -        | 7 (41.2)  |       |
|                  | G2 | 3 (21.4)  | -        | 1 (50.0) | 4 (23.5)  |       |
|                  | G3 | 4 (28.6)  | 1 (100)  | 1 (50.0) | 6 (35.3)  | 0.314 |
|                  | G4 | -         | -        | -        | -         |       |
|                  | ✱  | 15 (29.4) | 1 (25)   | 2 (40.0) | 18 (30.0) | 0.864 |

**Table S2.** Chi<sup>2</sup> correlation results evaluating the Prognostic Index (PI) (low vs. high) and the clinicopathological variables.

| Clinicopathological variables         | PI Low n(%) | PI High n(%) | <i>p</i> |
|---------------------------------------|-------------|--------------|----------|
| Gender                                |             |              |          |
| Male                                  | 21 (77.8)   | 20 (71.4)    | 0.589    |
| Female                                | 6 (22.2%)   | 8 (28.6)     |          |
| Age at diagnosis (primary tumor)      |             |              |          |
| <65                                   | 12 (42.9)   | 15 (55.6)    | 0.346    |
| ≥65                                   | 16 (57.1)   | 12 (44.4)    |          |
| Age at metastasis                     |             |              |          |
| <65                                   | 12 (42.9)   | 15 (55.6)    | 0.346    |
| ≥65                                   | 16 (57.1)   | 12 (44.4)    |          |
| Time between diagnosis and metastasis |             |              |          |

|                                        |           |           |       |
|----------------------------------------|-----------|-----------|-------|
| Metastasis at diagnosis                | 11 (39.3) | 9 (33.3)  | 0.655 |
| ≤1 years                               | 6 (21.4)  | 9 (33.3)  |       |
| ≤5 years                               | 8 (28.6)  | 5 (18.5)  |       |
| >5 years                               | 3 (10.7)  | 4 (14.8)  |       |
| Metastatic disease at study enrollment |           |           |       |
| Number of metastatic sites             |           |           |       |
| 1                                      | 9 (32.1)  | 11 (42.3) | 0.086 |
| 2                                      | 17 (60.7) | 9 (34.6)  |       |
| 3                                      | 0 (0.0)   | 4 (15.4)  |       |
| 4                                      | 2 (7.1)   | 2 (7.7)   |       |
| Risk factor (MSKCC*)                   |           |           |       |
| Good                                   | 7 (25.9)  | 2 (7.4)   | 0.062 |
| Intermediate                           | 18 (66.7) | 19 (67.9) |       |
| Bad                                    | 2 (7.4)   | 7(25.0)   |       |
| Therapy                                |           |           |       |
| Sunitinib                              | 24 (85.7) | 25 (89.3) | 0.508 |
| Pazopanib                              | 1 (3.6%)  | 2 (7.1)   |       |
| Sunitib + Pazopanib                    | 3 (10.7)  | 1 (3.6)   |       |

\*MSKCC = Memorial Sloan Kettering Cancer Centre.

**Table S3.** Harrell's Concordance (C) coefficient for each individual biomarker and for the PI index.

| Cytokine/<br>chemokine | PFS<br>Harrell's C | 95% CI       | <i>p</i> | OS<br>Harrell's C | 95% CI       | <i>p</i> |
|------------------------|--------------------|--------------|----------|-------------------|--------------|----------|
| HGF                    | 0.68               | (0.60–0.75)  | <0.0001  | 0.65              | (0.55–0.74)  | <0.0001  |
| IL-6                   | 0.60               | (0.49–0.69)  | <0.0001  | 0.61              | (0.51–0.72)  | <0.0001  |
| CXCL10                 | 0.58               | (0.48–0.69)  | <0.0001  | 0.58              | (0.47–0.68)  | <0.0001  |
| CXCL11                 | 0.68               | (0.60–0.76)  | <0.0001  | 0.67              | (0.57–0.76)  | <0.0001  |
| PI                     | 0.70               | (0.63–0.78)  | <0.0001  | 0.69              | (0.61–0.77)  | <0.0001  |
| Comparison             | Coefficient        | 95% CI       | <i>p</i> | Coefficient       | 95% CI       | <i>p</i> |
| PI vs. HGF             | 0.026              | (−0.06–0.11) | 0.54     | 0.043             | (−0.04–0.13) | 0.337    |
| PI vs. IL-6            | 0.108              | (0.004–0.21) | 0.041    | 0.074             | (−0.02–0.17) | 0.128    |
| PI vs. CXCL10          | 0.117              | (0.02–0.21)  | 0.015    | 0.110             | (0.006–0.21) | 0.037    |
| PI vs CXCL11           | 0.021              | (−0.04–0.08) | 0.52     | 0.023             | (−0.04–0.95) | 0.52     |
